# Supplementary material
Source: publisher figshare collection journal article supplement (https://frontiersin.figshare.com/ndownloader/files/18024104)

**Supplementary Figure 1.** The rarefaction plots of the 16 metagenomes indicating the coverage of the sequencing.

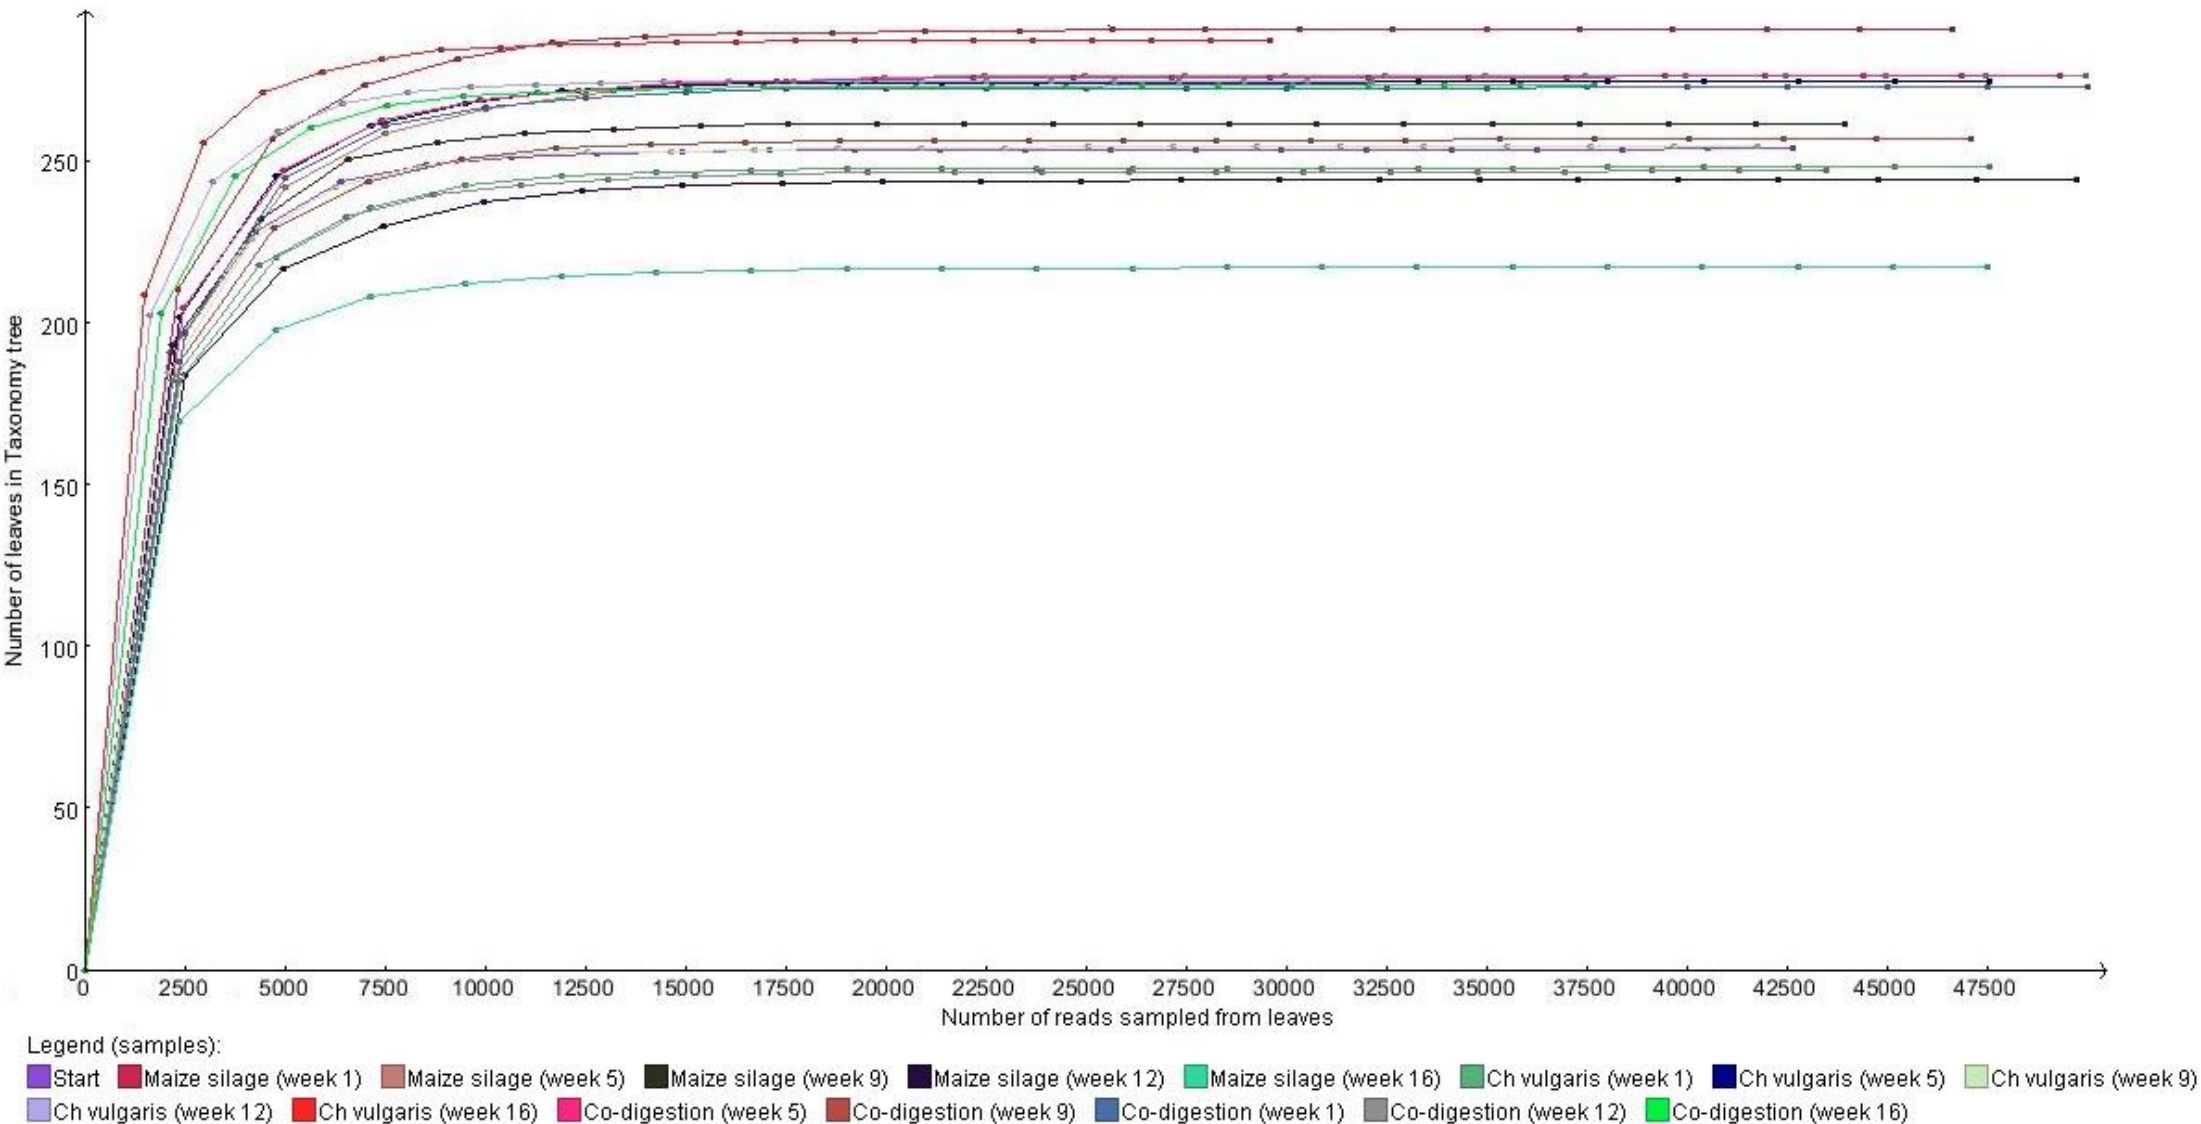

Supplement: Supplementary file 1 [file 18024104]
